# Supplementary material for: The S1 spike protein of SARS-CoV-2 upregulates the ERK/MAPK signaling pathway in DC-SIGN-expressing THP-1 cells
Source: PubMed Central journal article supplement — Cell Stress Chaperones. 2024 Mar 5;29(2):227–34. doi: 10.1016/j.cstres.2024.03.002 (PMC10951521; doi:10.1016/j.cstres.2024.03.002), 2024-03-05

## Supplementary Figure S1

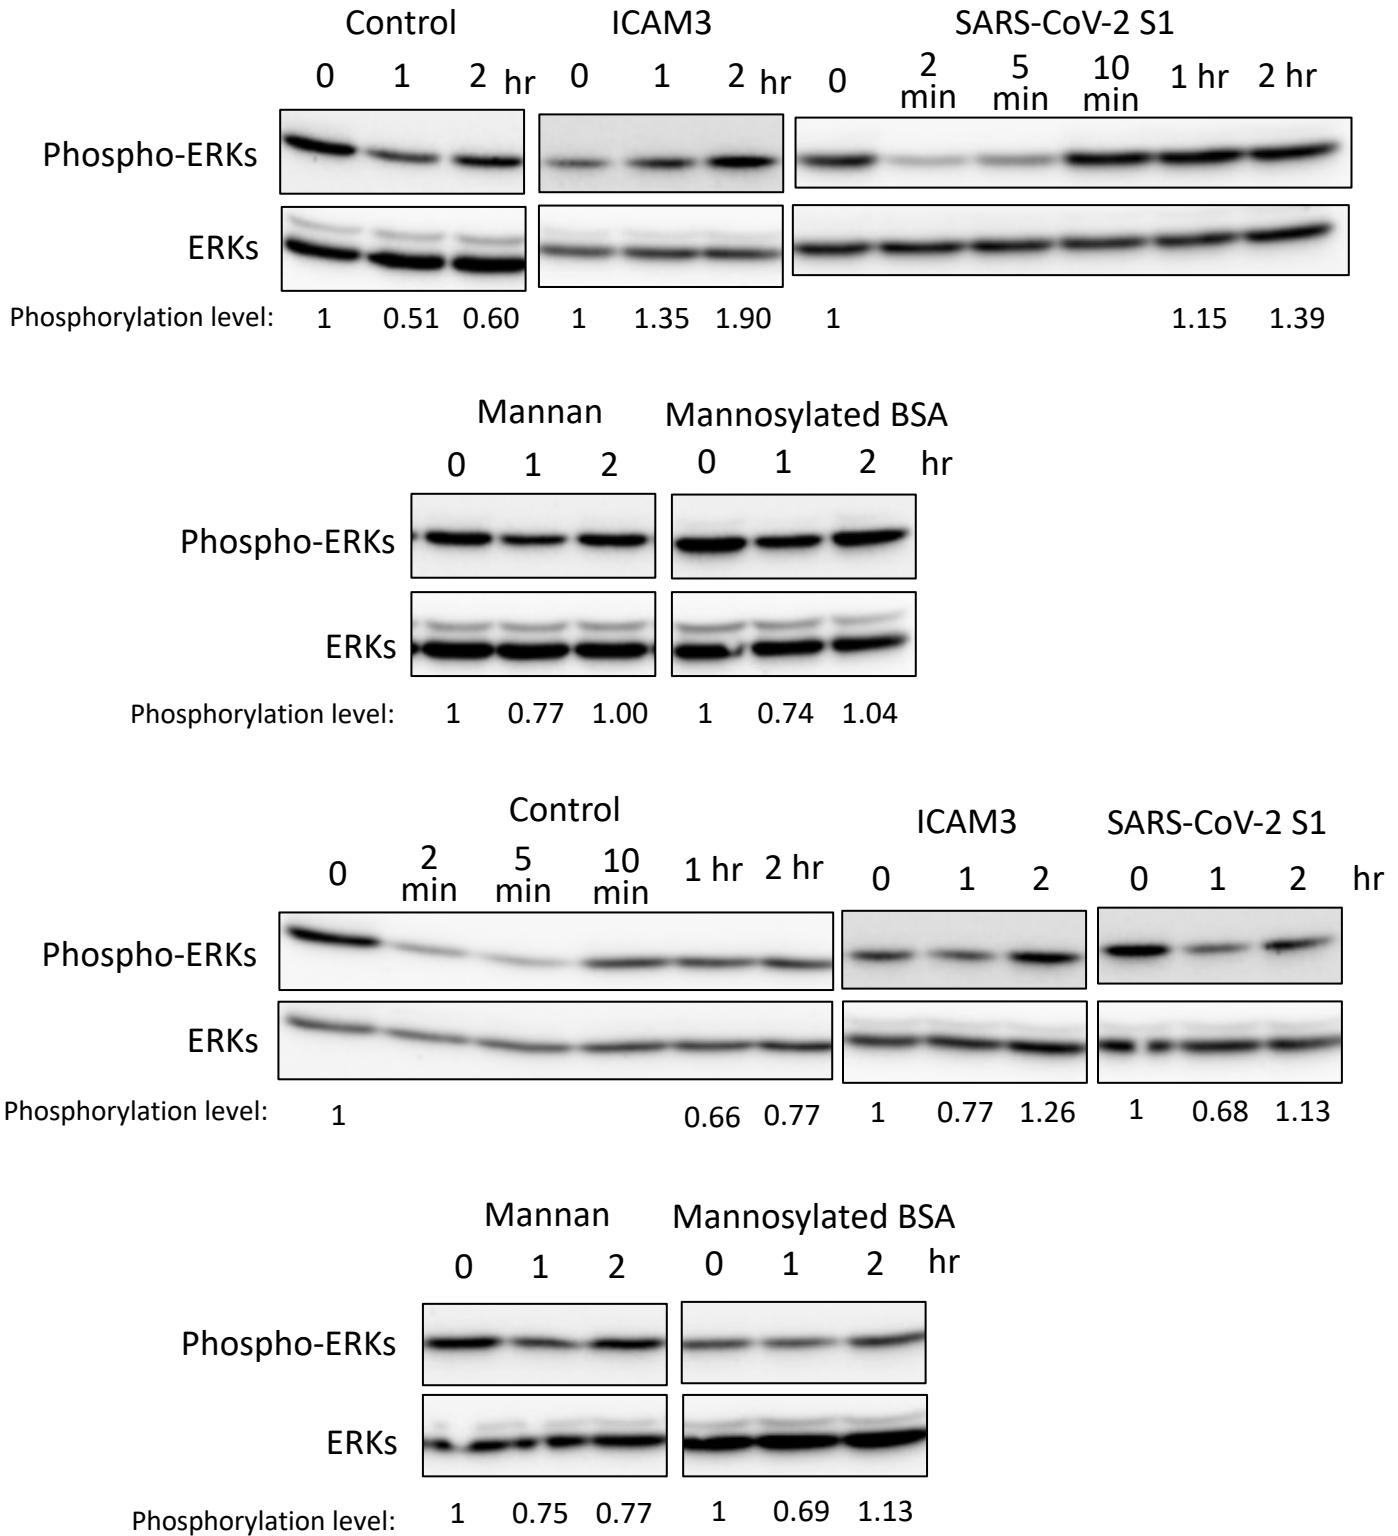

## Supplementary Figure S2

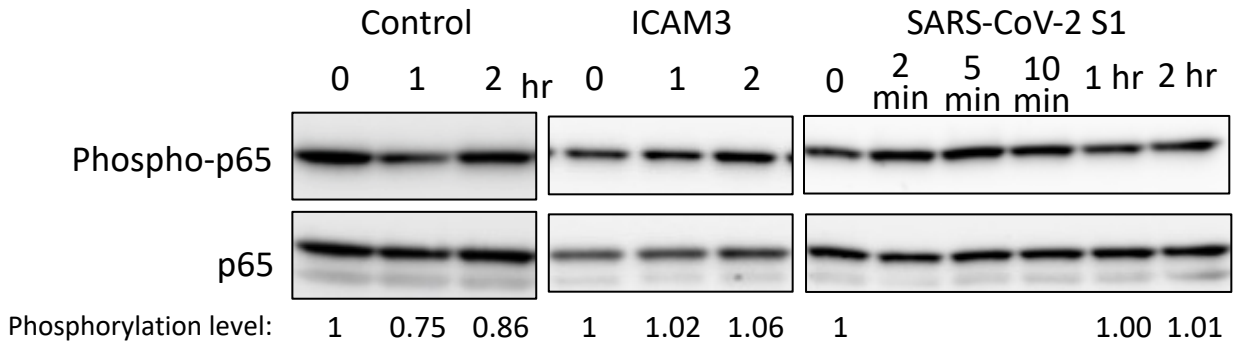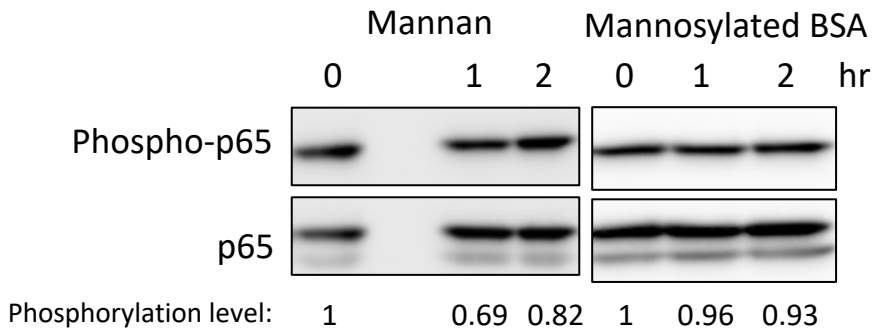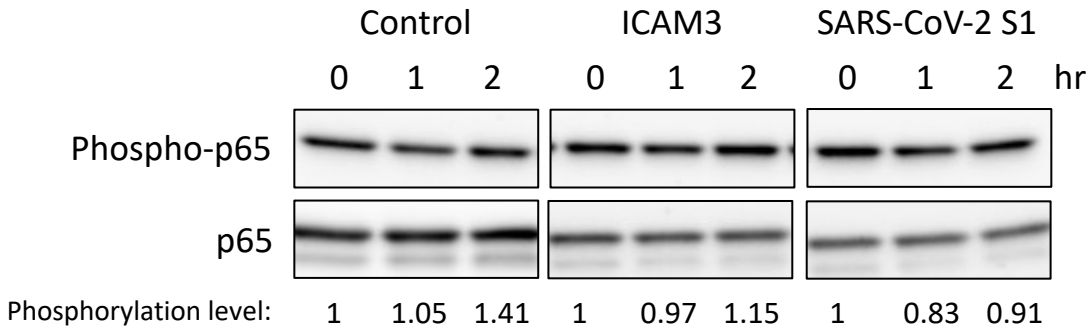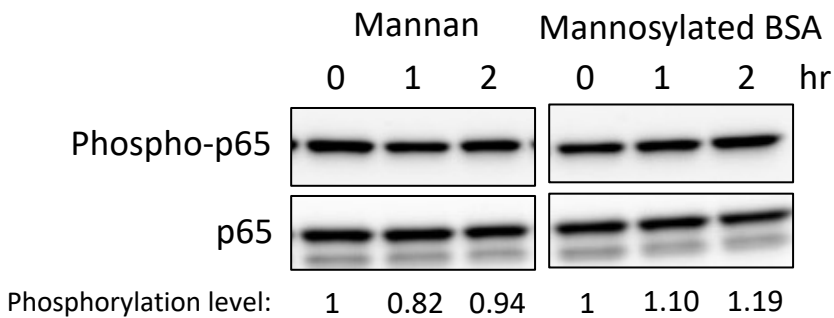

## Supplementary Figure S3

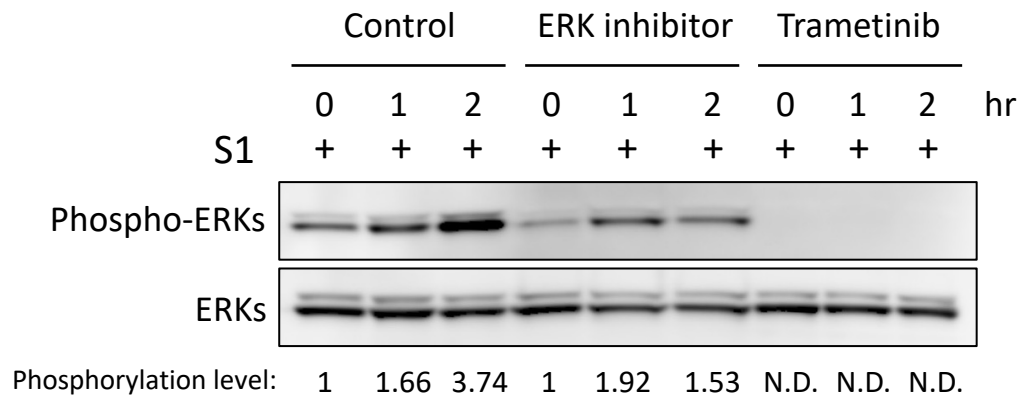

# Supplementary Figure S4

**A**

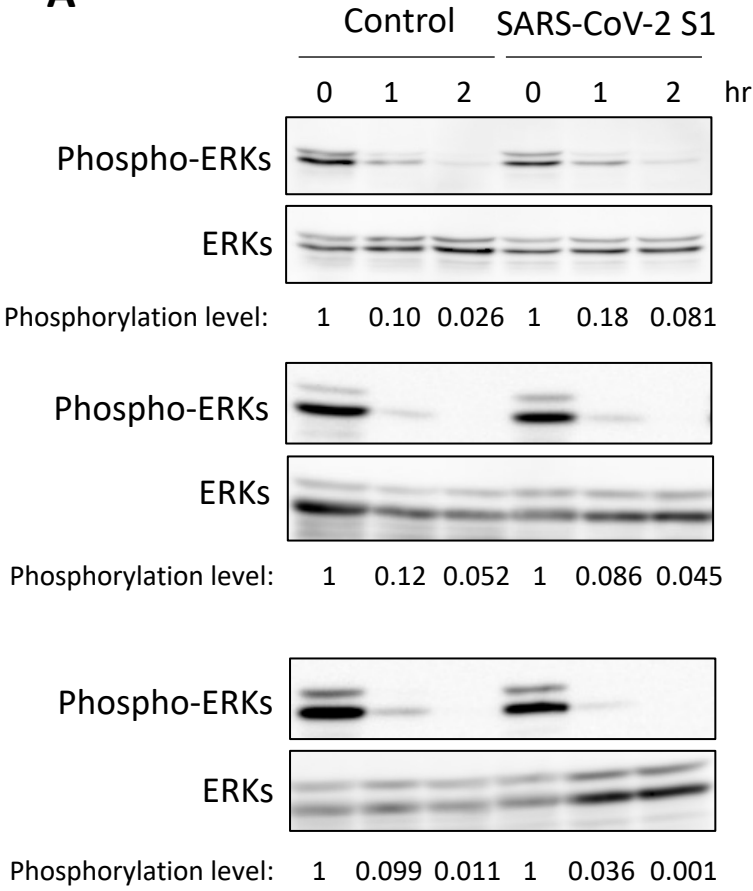

**B**

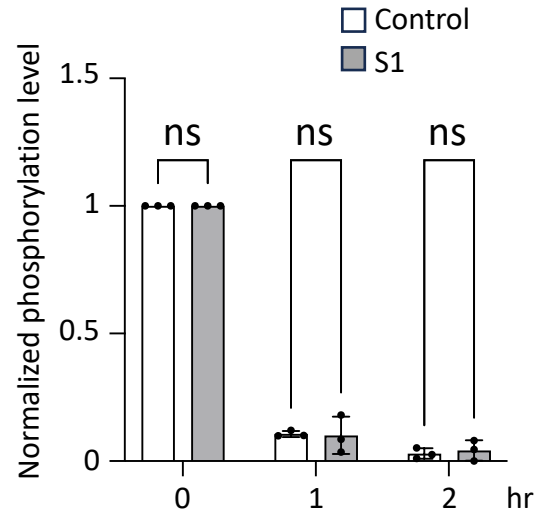

# Supplementary Figure S5

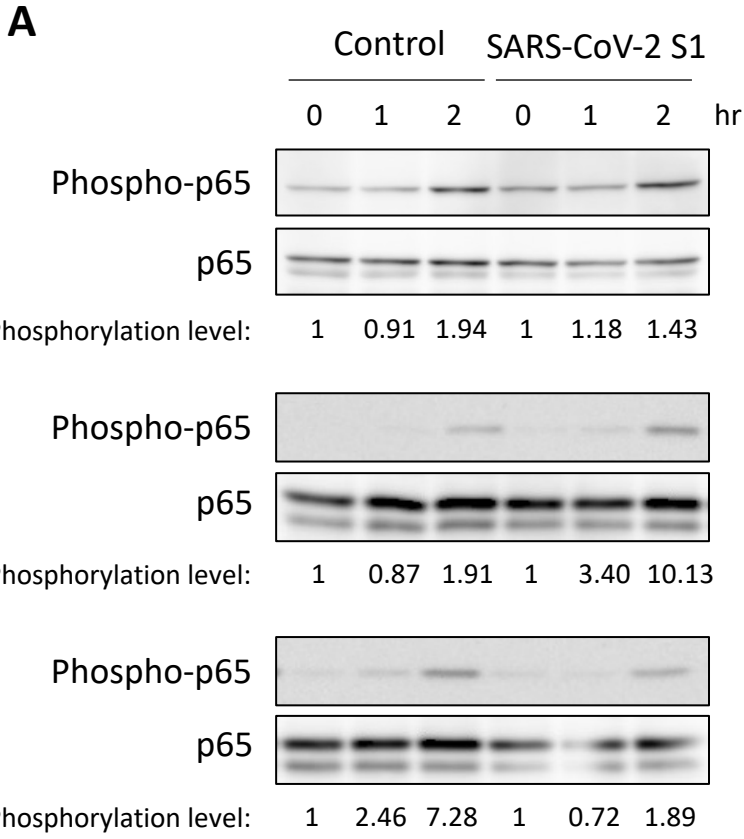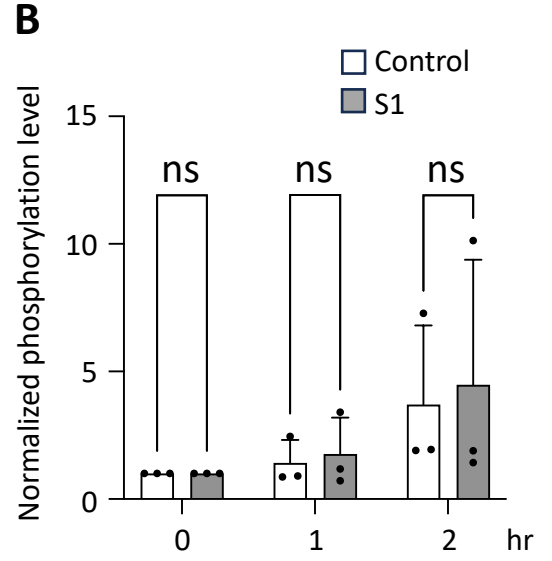

Supplement: mmc1.pdf [file mmc1.pdf]
